# Supplementary material
Source: PubMed Central journal article supplement (PMC4452568)
Supplement: EC.00002-15_zek999094435so1.pdf [file EC.00002-15_zek999094435so1.pdf]

## Supporting Information

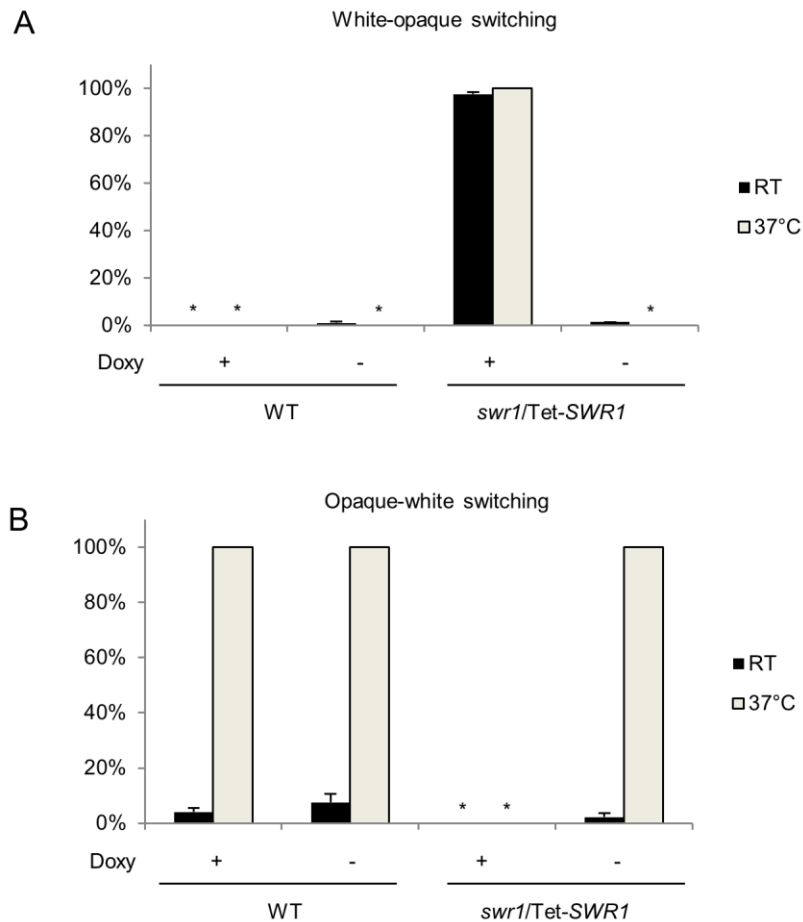

Figure S1. Expression of *SWR1* restores low white-to-opaque switching and opaque instability to *swr1*.

(A) White-opaque switching and (B) opaque-white switching of *MTLa/a* WT (HLY4357) and *swr1/Tet-SWR1* strain (HLY4296). The strains were converted from the *MTLa/a* wild-type strain CaSS1 and the *swr1/Tet-SWR1* conditional mutant from the GRACE collection (1) by growth on solid SC + 2% sorbose medium at a density of  $10^5$  cells per plate for 6 days (2). Stably white or opaque cells were grown on solid SCD medium with 50  $\mu\text{g/ml}$  doxycycline to repress expression of *SWR1* from the pTet promoter, or without doxycycline for *SWR1* expression. White-opaque phenotype was assayed after 7 days of growth at RT or 37  $^{\circ}\text{C}$ . \*: 0% switching occurred.

Table S1. Primers used for mapping the *WOR1* promoter.

| Primer name + target amplicon location<br>(bp upstream of <i>WOR1</i> ATG) | Sequence                  |
|----------------------------------------------------------------------------|---------------------------|
| ZG10F:3640-3540                                                            | TATACAGCCCATTGCTAGATC     |
| ZG11F:3600-3500                                                            | AGAATGTCAAATGACATAATAAGA  |
| ZG12F:3560-3460                                                            | GTAGAACCTGTACACTCTTTG     |
| ZG13F:3520-3420                                                            | TATTTTTTTGCATTCTAGTTGCG   |
| ZG14F:3480-3380                                                            | CTTTATTATTATCATTGTATGGTTT |
| ZG15F:3440-3340                                                            | CTAATGAATCCCGATAAATATATA  |
| ZG16F:3400-3300                                                            | GAATCTTGTTTAAGTGATAGATT   |
| ZG17F:3360-3260                                                            | AAAAAGTTTGTATCAGTTTCTACTA |
| ZG18F:3320-3220                                                            | AATTACTGTTCAATCCCCAGAA    |
| ZG19F:3280-3180                                                            | AAATCAACAGACTAACTACAAAC   |
| ZG20F:3240-3140                                                            | TGAAAATAAAAGGACAAAACAAG   |
| ZG21F:3200-3100                                                            | TGGACTCTTCACTGTTTTGAAA    |
| ZG22F:3160-3060                                                            | TATTTTCGTGAATATTTTTCCTTC  |
| ZG23F:3120-3020                                                            | CTATTTTCAAGAAATTTCCACTT   |
| ZG24F:3080-2980                                                            | TGTCCCCGATTTGAGATATT      |
| ZG25F:3040-2940                                                            | CTGAAATTTCTGCTAGAGAG      |
| ZG26F:3000-2900                                                            | TTATTCAAAATCTTGATACCCTAT  |
| ZG27F:2960-2860                                                            | ATAGACTTTGATAGTTCATGATT   |
| ZG28F:2920-2820                                                            | GTGCTTAATTCTAATTTTGCCA    |
| ZG29F:2880-2780                                                            | GATCAAAAACAAAAAAAAGAAAAT  |
| ZG30F:2840-2740                                                            | ATGTCTATCTATATTCAAGTATC   |
| ZG31F:2800-2700                                                            | GTA ACTATAAAGGTTGTCTTGTA  |
| ZG32F:2760-2660                                                            | TAACGTCATCTCATCTCAAATTT   |
| ZG33F:2720-2620                                                            | AAACCAAAAAAATTCTTAACTTTG  |
| ZG34F:2680-2580                                                            | TTGTCGTCTTTGCTATAGTTAG    |
| ZG35F:2640-2540                                                            | TTTCCTTTTTTTTGTCAATATCTC  |
| ZG36F:2600-2500                                                            | TAGTATCAATATTACTGATCTTG   |
| ZG37F:2560-2460                                                            | TGGCACTACCAAATGTAATAAT    |
| ZG38F:2520-2420                                                            | AAATTTTCGGGAGTTTAGTGATA   |
| ZG39F:2480-2380                                                            | GGAAAAAAAACAGGGAATTAC     |
| ZG40F:2440-2340                                                            | GTATAGTCTGTGCAGACTTTG     |
| ZG41F:2400-2300                                                            | CCTTGCATTTACAAAAGTTTAAAT  |
| ZG42F:2360-2260                                                            | CTTTATTTAAAAACAAAAAACAAC  |
| ZG43F:2320-2220                                                            | GGGAAACAAGGAACACAGTTA     |
| ZG44F:2280-2180                                                            | GTTTATAGGCGGGTCTACATT     |
| ZG45F:2240-2140                                                            | AAGAAAAAAAACAACAATTACCAA  |

|                  |                            |
|------------------|----------------------------|
| ZG46F:2200-2100  | CCATTGTAACCATAAAGAAGTAT    |
| ZG47F:2160-2060  | AAGAAAAACCACTGGGTGTAAA     |
| ZG48F:2120-2020  | CAGATAGACATTTTCATTTAAGCA   |
| ZG97F:2080-1980  | AGAGAGAAAACGAGAGAAGAAA     |
| ZG98F:2040-1940  | TTGAATTATTTAACACAACCTTTGAA |
| ZG99F:2000-1900  | CTCAAAGTTTTGATTTCTATTTTTT  |
| ZG100F:1960-1860 | TGAATTTATTCTTATTATTTTAACTC |
| ZG101F:1920-1820 | CTATCAATTAGATCACTTAACTAT   |
| ZG102F:1880-1780 | TTTGCTGTTACTGCTACCACT      |
| ZG103F:1840-1740 | TTTTAAATTAAGTGAATTACCCC    |
| ZG104F:1800-1700 | GTCTTTTAAATTCAGGACACTAA    |
| ZG105F:1760-1660 | CGACCAACACTTTTTCTGATTT     |
| ZG106F:1720-1620 | CTCAGAAGTTCAATCACCGTT      |
| ZG107F:1680-1580 | ATAGGAGATTCCAGTTATCATT     |
| ZG10R:3640-3540  | AAAGAGTGTACAGGTTCTACT      |
| ZG11R:3600-3500  | GCAACTAGAATGCAAAAAATAAT    |
| ZG12R:3560-3460  | CATACAATGATAATAATAAAGAAAA  |
| ZG13R:3520-3420  | TATTTATCGGGATTCATTAGCTT    |
| ZG14R:3480-3380  | CTATCACTTAAACAAGATTCGAA    |
| ZG15R:3440-3340  | AACTGATACAACTTTTTCTTTT     |
| ZG16R:3400-3300  | TGGGGATTGAACAGTAATTGT      |
| ZG17R:3360-3260  | TGTAGTTAGTCTGTTGATTTACT    |
| ZG18R:3320-3220  | TTTTGTCTTTTATTTTTTCACAG    |
| ZG19R:3280-3180  | TCAAAACAGTGAAGAGTCCAC      |
| ZG20R:3240-3140  | GAAAAATATTCACGAAAATAATAGA  |
| ZG21R:3200-3100  | TGGAAATTTCTTGAAAATAGTAAC   |
| ZG22R:3160-3060  | ATATCTCAAATACGGGGACATT     |
| ZG23R:3120-3020  | TCTCTAGCAGGAAATTCAGG       |
| ZG24R:3080-2980  | GGTATCAAGATTTTGAATAATAATA  |
| ZG25R:3040-2940  | CATGAACTATCAAAGTCTATGC     |
| ZG26R:3000-2900  | GCAAATTAGAATTAAGCACCT      |
| ZG27R:2960-2860  | CTTTTTTTTTGTTTTTGATCAAAGT  |
| ZG28R:2920-2820  | ACTTGAATATAGATAGACATCAC    |
| ZG29R:2880-2780  | AAGACAACCTTTATAGTTACAATT   |
| ZG30R:2840-2740  | TTTGAGATGAGATGACGTTATAT    |
| ZG31R:2800-2700  | TTAAGAATTTTTTTTGGTTTTGTTC  |
| ZG32R:2760-2660  | AACTATAGCAAAGACGACAAAAA    |
| ZG33R:2720-2620  | TATTGACAAAAAAAAGGAAATGAC   |
| ZG34R:2680-2580  | GATCAGTAATATTGATACTACTAA   |
| ZG35R:2640-2540  | TATTACATTTGGTAGTGCCAGA     |
| ZG36R:2600-2500  | TCACTAACTCCCGAAATTTCT      |

|                                                 |                            |
|-------------------------------------------------|----------------------------|
| ZG37R:2560-2460                                 | TTCCCTGTTTTTTTTTCCTTTTA    |
| ZG38R:2520-2420                                 | GTCTGCACAGACTATACACAA      |
| ZG39R:2480-2380                                 | TTAAACTTTTGTAATGCAAGGAT    |
| ZG40R:2440-2340                                 | TTTTTTGTTTTTAAATAAAGTCAAAG |
| ZG41R:2400-2300                                 | GTTTTTTTGTTTTTAAATAAAGTCAA |
| ZG42R:2360-2260                                 | ATGTAGACCCGCCTATAAACA      |
| ZG43R:2320-2220                                 | AATTGTTGTTTTTTTTTCTTTGTCT  |
| ZG44R:2280-2180                                 | CTTCTTTATGGTTACAATGGTTT    |
| ZG45R:2240-2140                                 | TACACCCAGTGGTTTTTCTTA      |
| ZG46R:2200-2100                                 | TTAAATGAAATGTCTATCTGACAT   |
| ZG47R:2160-2060                                 | TCTTCTCTCGTTTTTCTCTCTG     |
| ZG48R:2120-2020                                 | AGTTGTGTTAAATAATTCAATATTTA |
| ZG97R:2080-1980                                 | ATAGAAATCAAACTTTGAGATTTA   |
| ZG98R:2040-1940                                 | AAATAATAAGAATAAATTCAAAACCT |
| ZG99R:2000-1900                                 | TTAAGTGATCTAATTGATAGTAGA   |
| ZG100R:1960-1860                                | GTGGTAGCAGTAACAGCAAA       |
| ZG101R:1920-1820                                | GTAATTCACTTAATTTAAAAGTTATA |
| ZG102R:1880-1780                                | GTGTCCTGAATTTAAAAGACAAA    |
| ZG103R:1840-1740                                | ATCAGAAAAAGTGTTGGTCGTT     |
| ZG104R:1800-1700                                | ACGGTGATTGAACTTCTGAGT      |
| ZG105R:1760-1660                                | TGATAACTGGAATCTCCTATG      |
| ZG106R:1720-1620                                | TTTGCCACAATGGAAAAAGTG      |
| ZG107R:1680-1580                                | CCTGCTTTATTGAACACACAAT     |
|                                                 |                            |
| For normalization to <i>BUD2</i> -1 nucleosome: |                            |
| BUD2-350F                                       | AGACAGACAGCCCTCAATC        |
| BUD2-350R                                       | CTGAAATAAATTTTGGTATTGGA    |
| BUD2-200F                                       | CAGTTCTATCCTATATATAATATA   |
| BUD2-200R                                       | GATTAATTTTTTTTTGGGGTATAAA  |
| BUD2-50F                                        | TCCACATTTTTTAAATTAAACTAT   |
| BUD2-50R                                        | CACGAGAAATGATTTTATGAAAT    |

## Supporting references

1. **Roemer T, Jiang B, Davison J, Ketela T, Veillette K, Breton A, Tandia F, Linteau A, Sillaots S, Marta C, Martel N, Veronneau S, Lemieux S, Kauffman S, Becker J, Storms R, Boone C, Bussey H.** 2003. Large-scale essential gene identification in *Candida albicans* and applications to antifungal drug discovery. *Mol Microbiol* **50**:167-181.
2. **Janbon G, Sherman F, Rustchenko E.** 1998. Monosomy of a specific chromosome determines L-sorbose utilization: a novel regulatory mechanism in *Candida albicans*. *Proc Natl Acad Sci U S A* **95**:5150-5155.
